# Supplementary material for: Iodine-loaded ZIF-7-coated cotton substrates show sustained iodine release as effective antibacterial textiles
Source: Royal Society of Chemistry journal article supplement (doi:10.1039/d3nj05198f), 2023-12-13
Supplement: d3nj05198f1.pdf [file d3nj05198f1.pdf]

## Supporting Information

### **Facile ZIF-7 Coating on Cotton Substrate with Sustained Iodine Release as an Effective Antibacterial Textile**

Donya Mohammadi Amidi, Kamran Akhbari\*

School of Chemistry, College of Science, University of Tehran, Tehran, Iran.

Tel.: +98 21 61113734; fax: +98 21 66495291.

E-mail address: akhbari.k@ut.ac.ir (K. Akhbari)

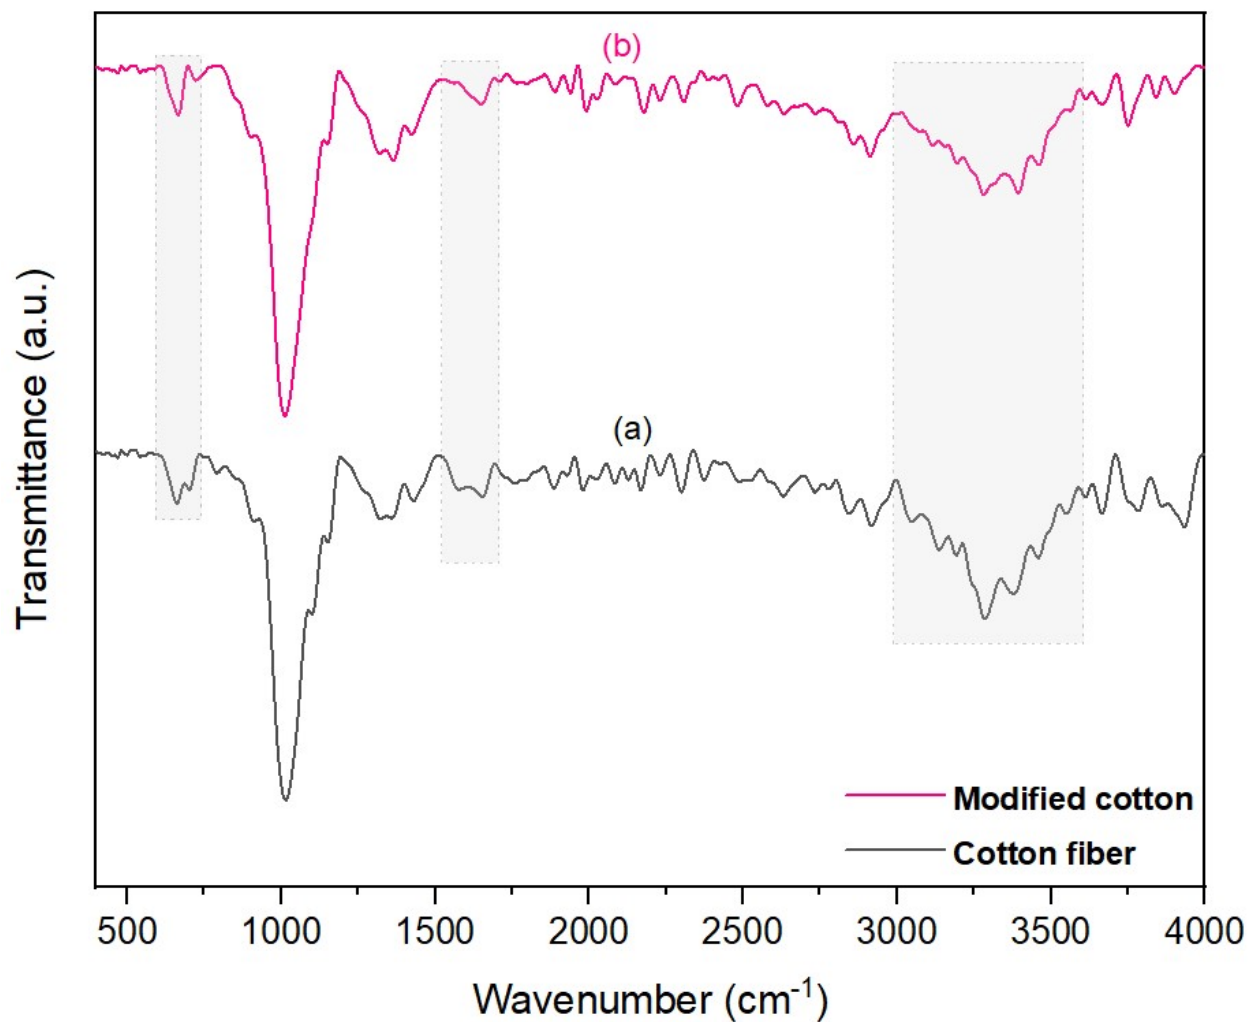

**Fig. S1.** FT-IR spectra of a) pure cotton fibers and b) modified cotton fibers (carboxymethylated).

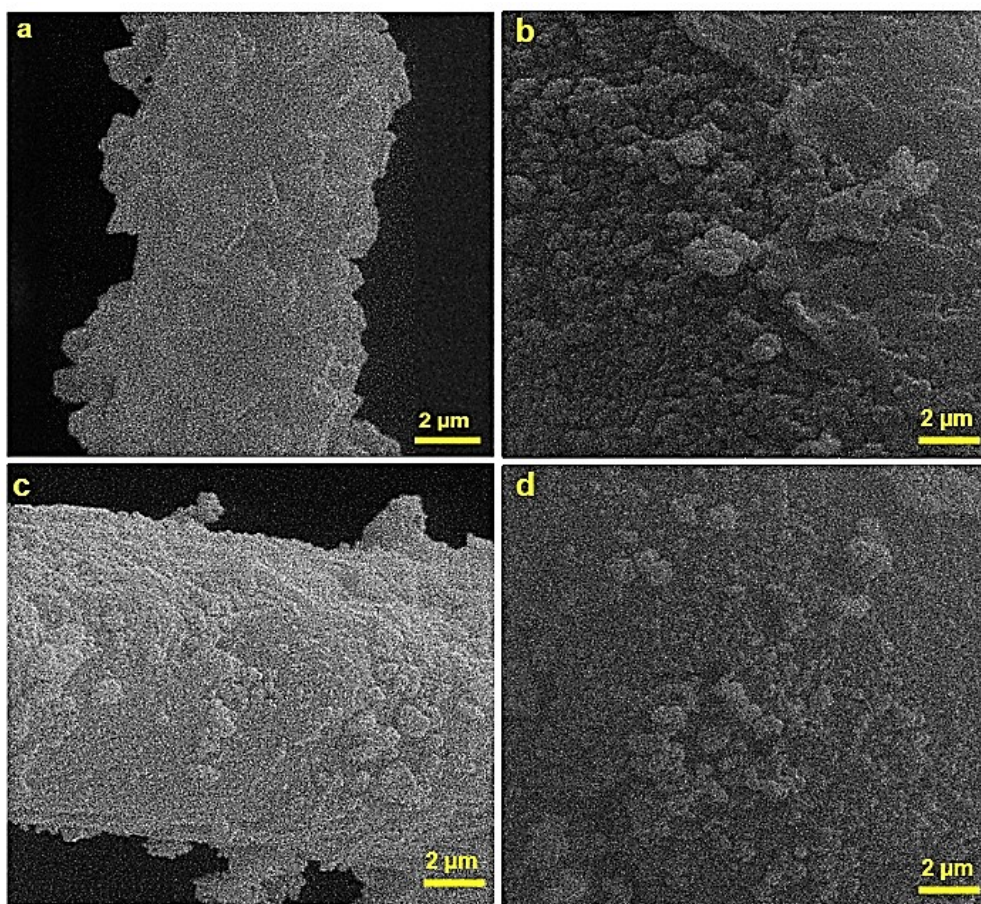

**Fig. S2.** FE-SEM images of a) ZIF-7@cotton (**1**), b) ZIF-7@cotton (**2**), c) I<sub>2</sub>@ZIF-7@cotton (I<sub>2</sub>@**1**), and d) I<sub>2</sub>@ZIF-7@cotton (I<sub>2</sub>@**2**) with scale bar 2 μm.

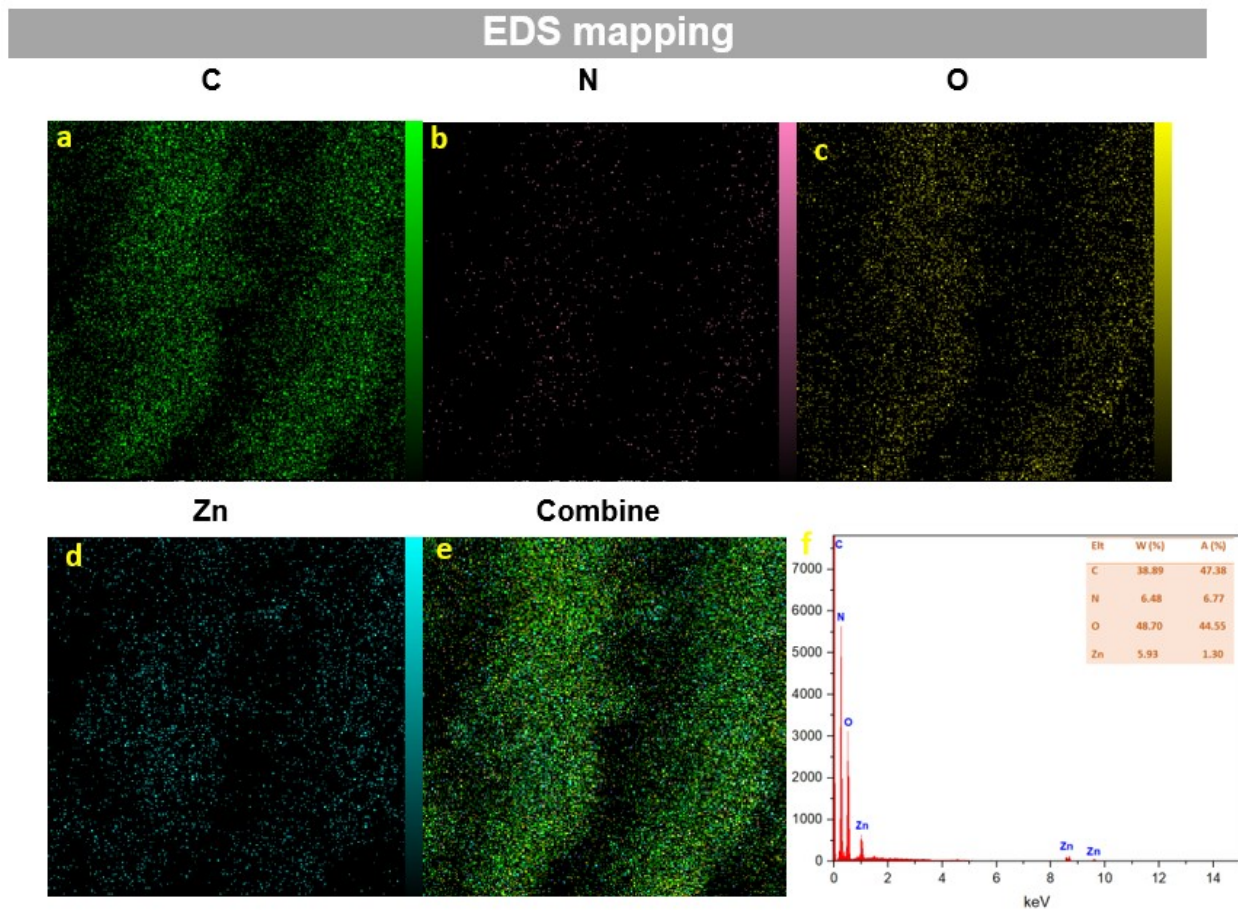

**Fig. S3.** (a–e) EDS mapping and (f) EDS spectrum of ZIF-7@cotton (1).

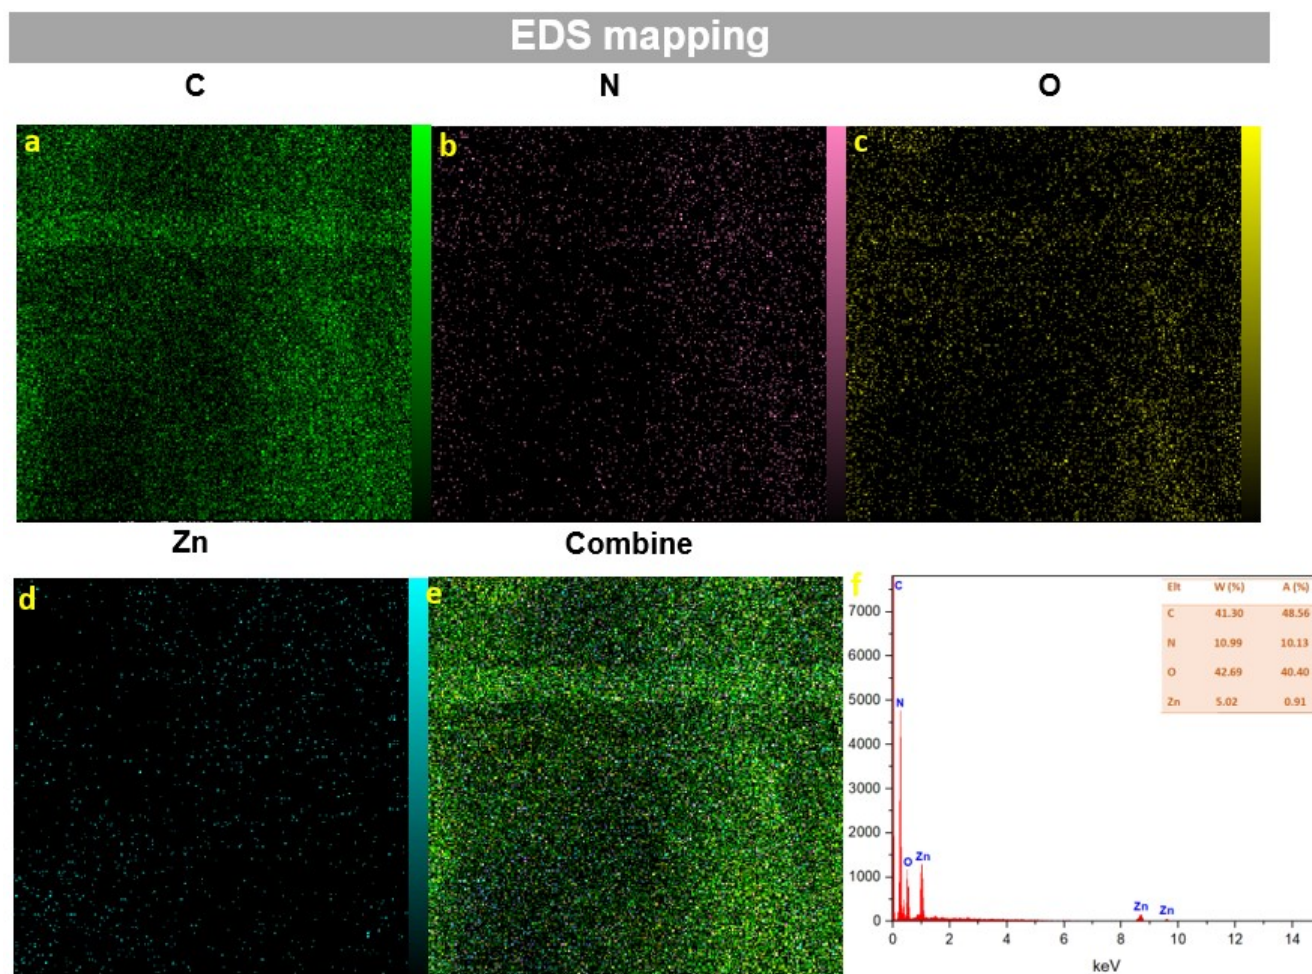

**Fig. S4.** (a–e) EDS mapping and (f) EDS spectrum of ZIF-7@ cotton (2).

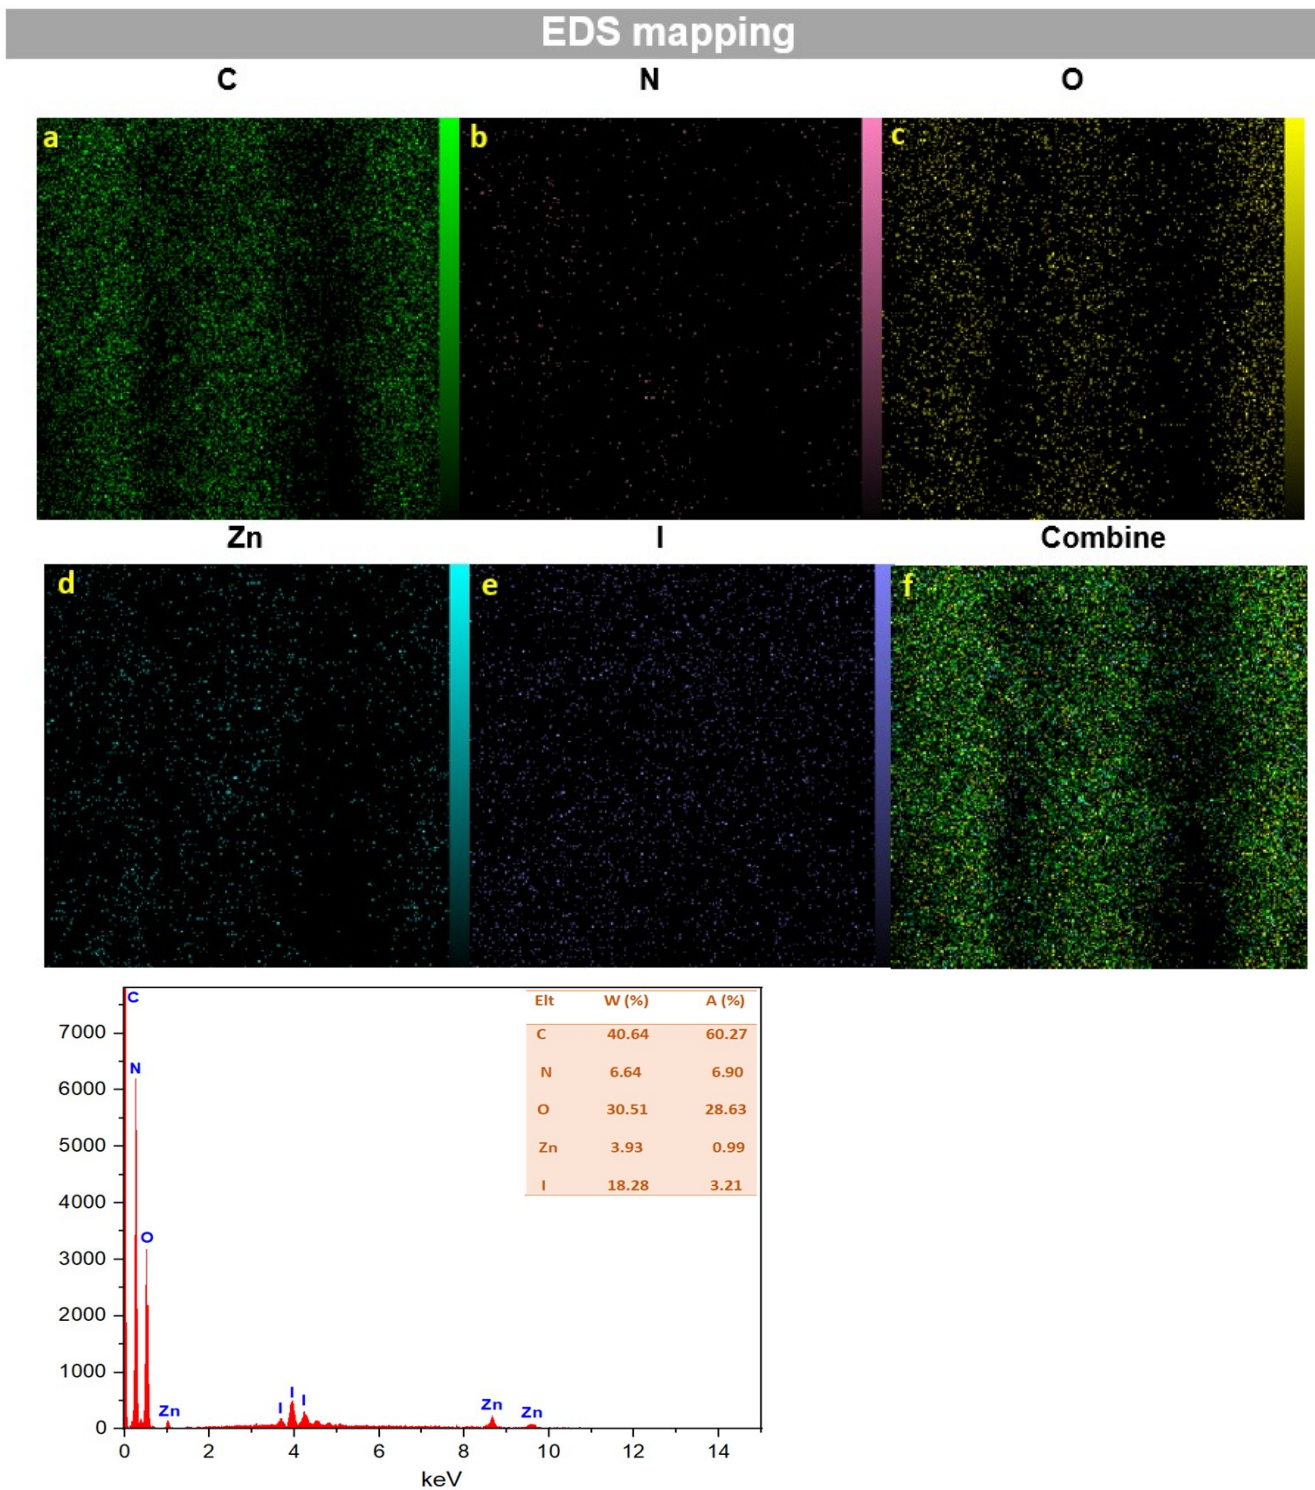

**Fig. S5.** (a–f) EDS mapping and (g) EDS spectrum of  $I_2@ZIF-7@$ cotton ( $I_2@1$ ) after iodine loading.

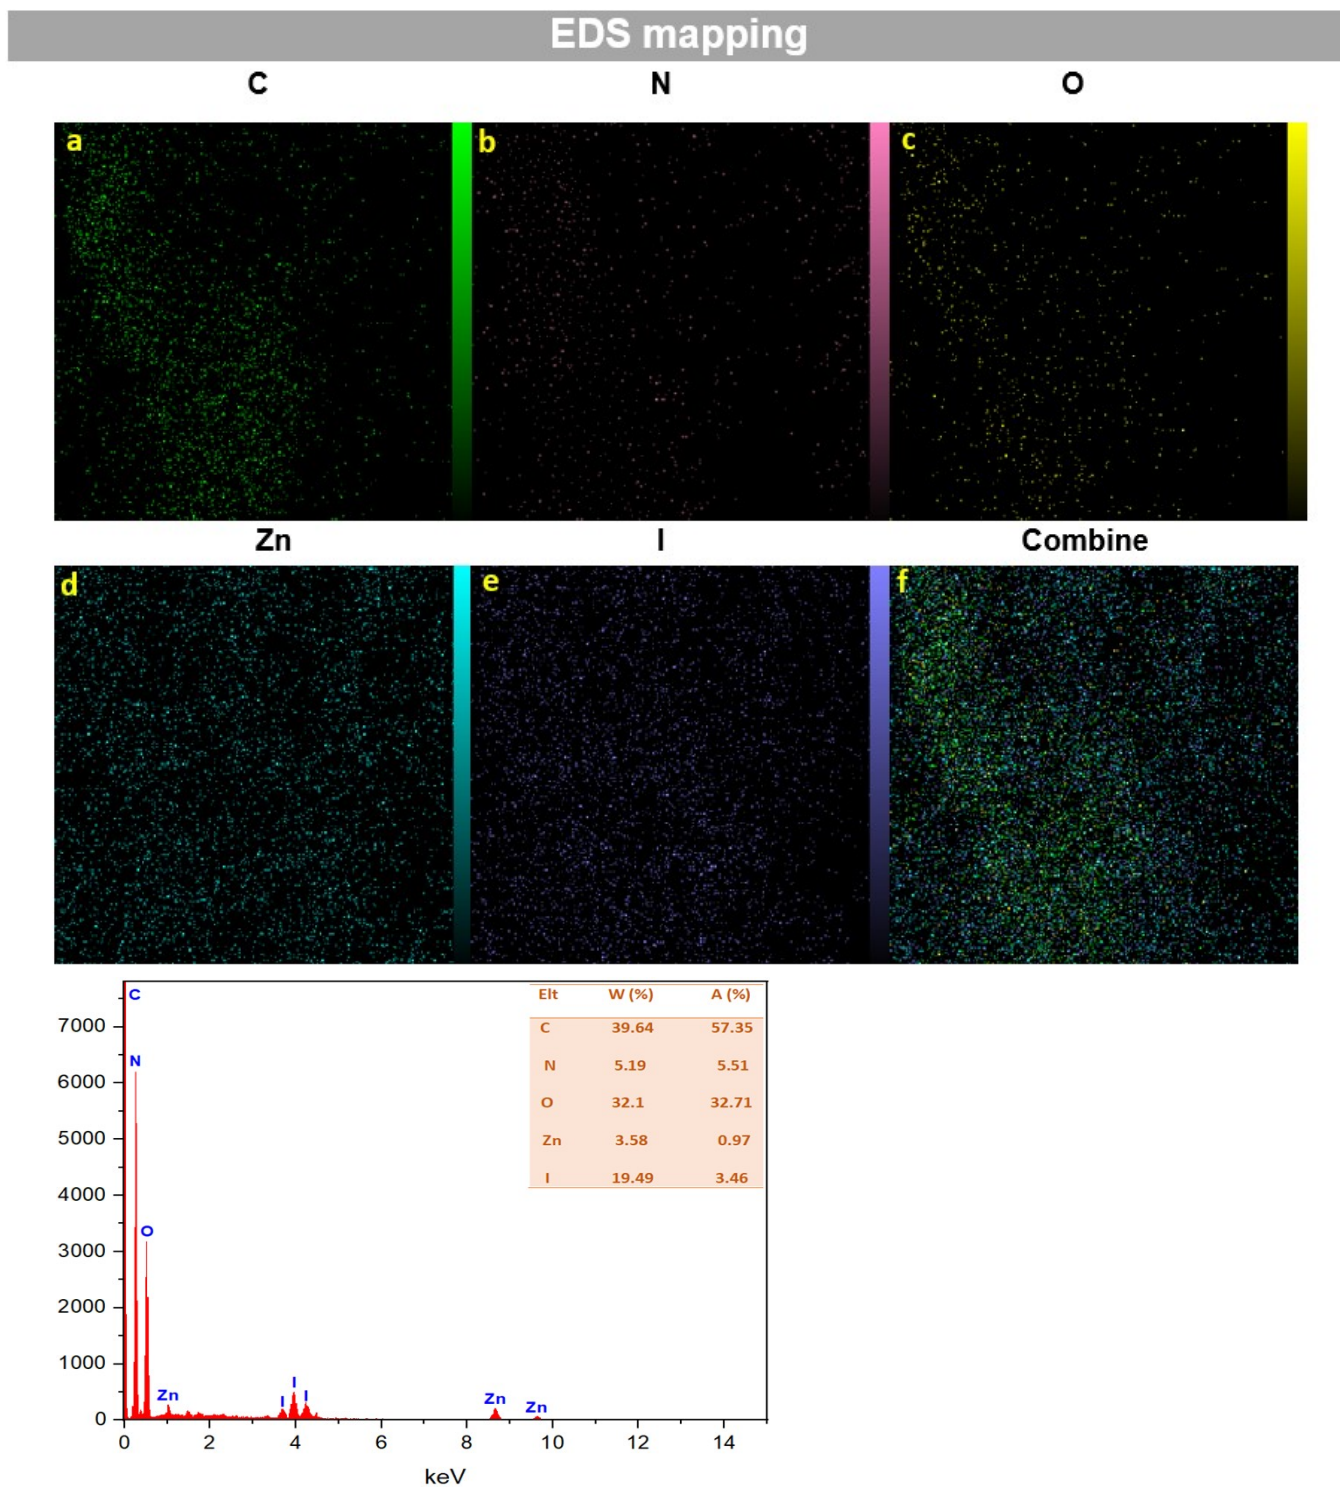

**Fig. S6.** (a–f) EDS mapping and (g) EDS spectrum of  $I_2@ZIF-7@cotton$  ( $I_2@2$ ) after iodine loading.

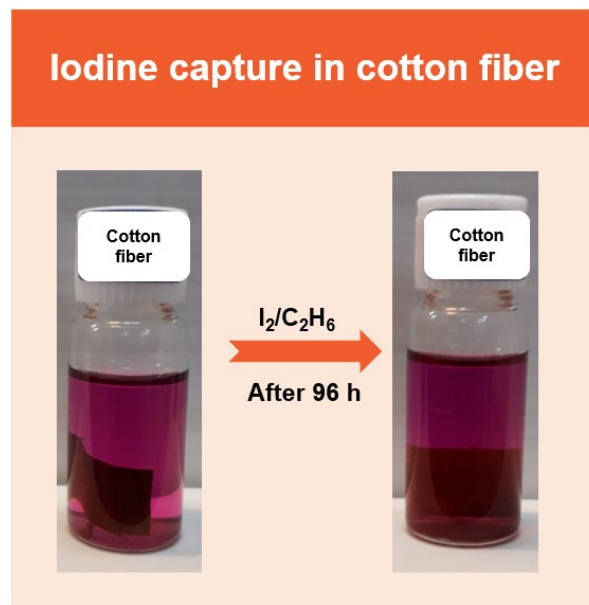

**Fig. S7.** Color change photograph of cotton fibers which were soaked in  $I_2$  cyclohexane solution (3 mL, 0.0025 M).



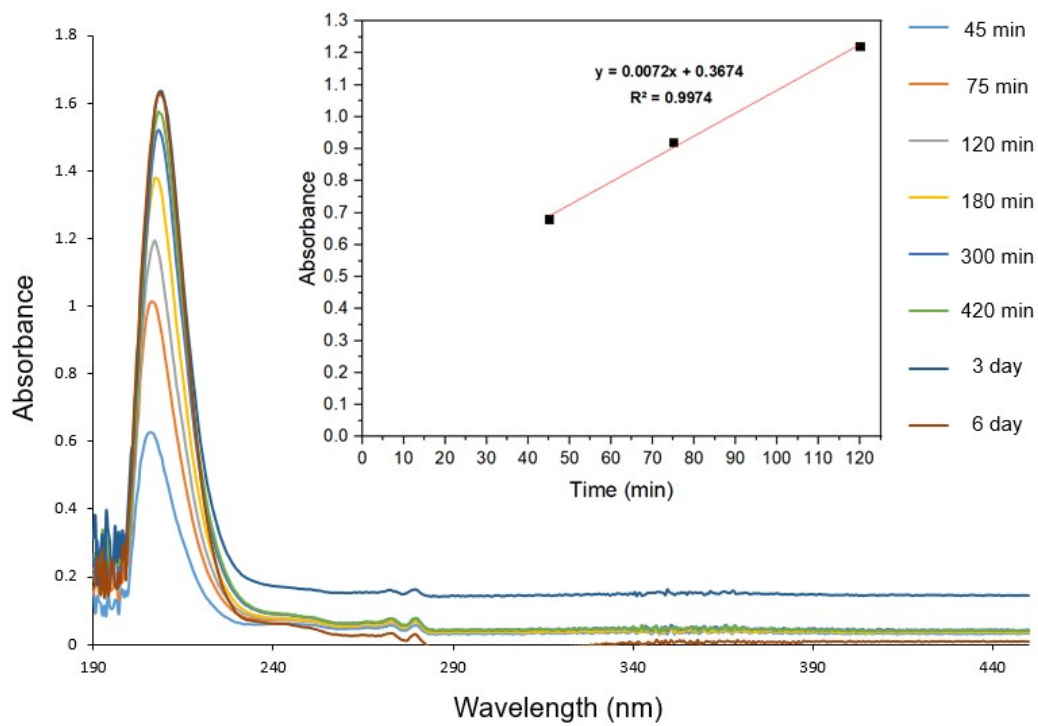

**Fig. S8.** The UV/vis spectra of ZIF-7 for the releasing process of iodine in ethanol; absorption curve vs. time.

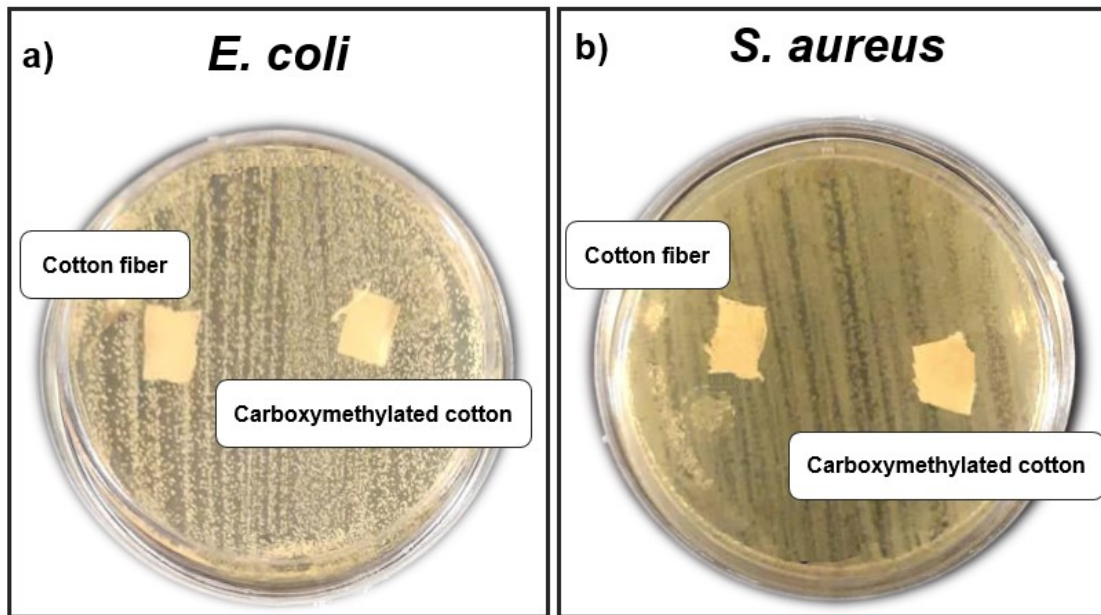

**Fig. S9.** Antibacterial activity of cotton fibers and carboxymethylated cotton fibers against a) *E. coli* and b) *S. aureus* strains.

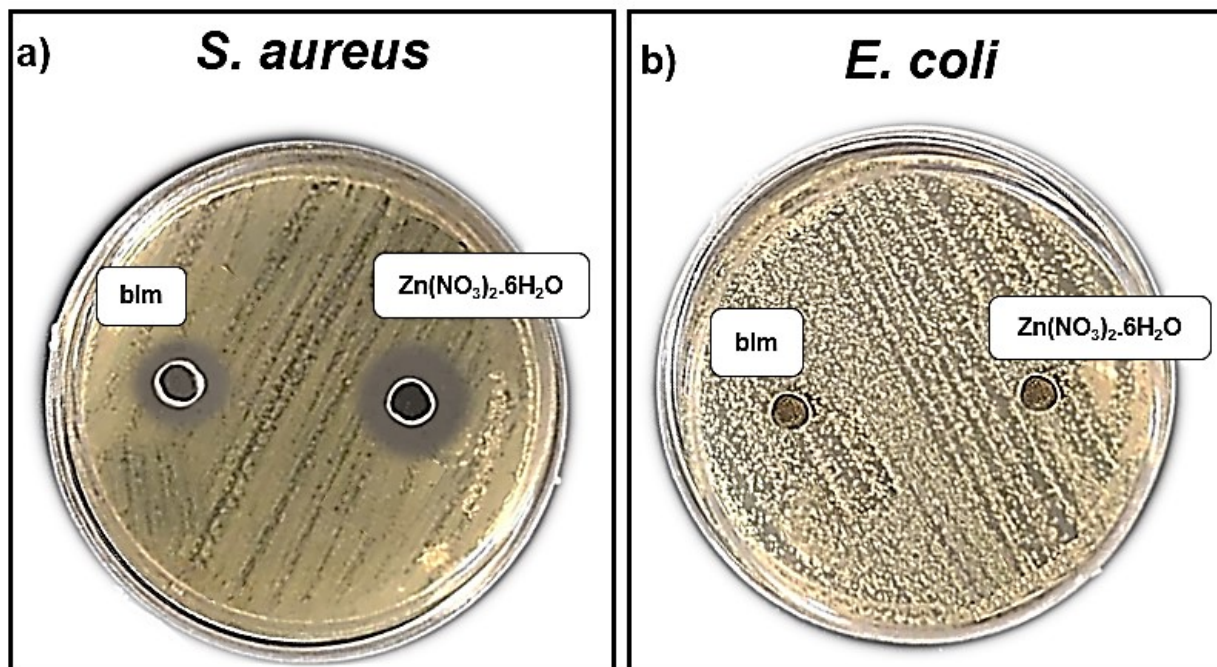

**Fig. S10.** Antibacterial activity of Zn(NO<sub>3</sub>)<sub>2</sub>·6H<sub>2</sub>O and benzimidazole (blm) against a) *S. aureus* and b) *E. coli* strains.

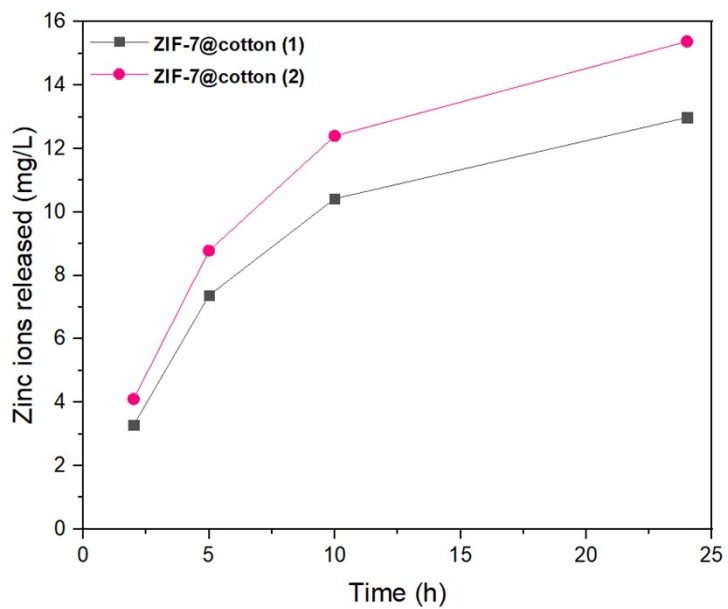

**Fig. S11.** Release of  $Zn^{2+}$  cations from ZIF-7@cotton (1) and ZIF-7@cotton (2) in the antibacterial medium.
